# Supplementary material for: Highly diverse RNA viruses and phage sequences concealed within birds
Source: PubMed Central journal article supplement (PMC11218532; doi:10.1128/spectrum.00802-24), 2024-06-11

**Supplementary Figure 1. The maximum likelihood trees of different RNA viruses were constructed based on RdRp proteins; red branches and black dots indicate novel viruses identified in this study.**

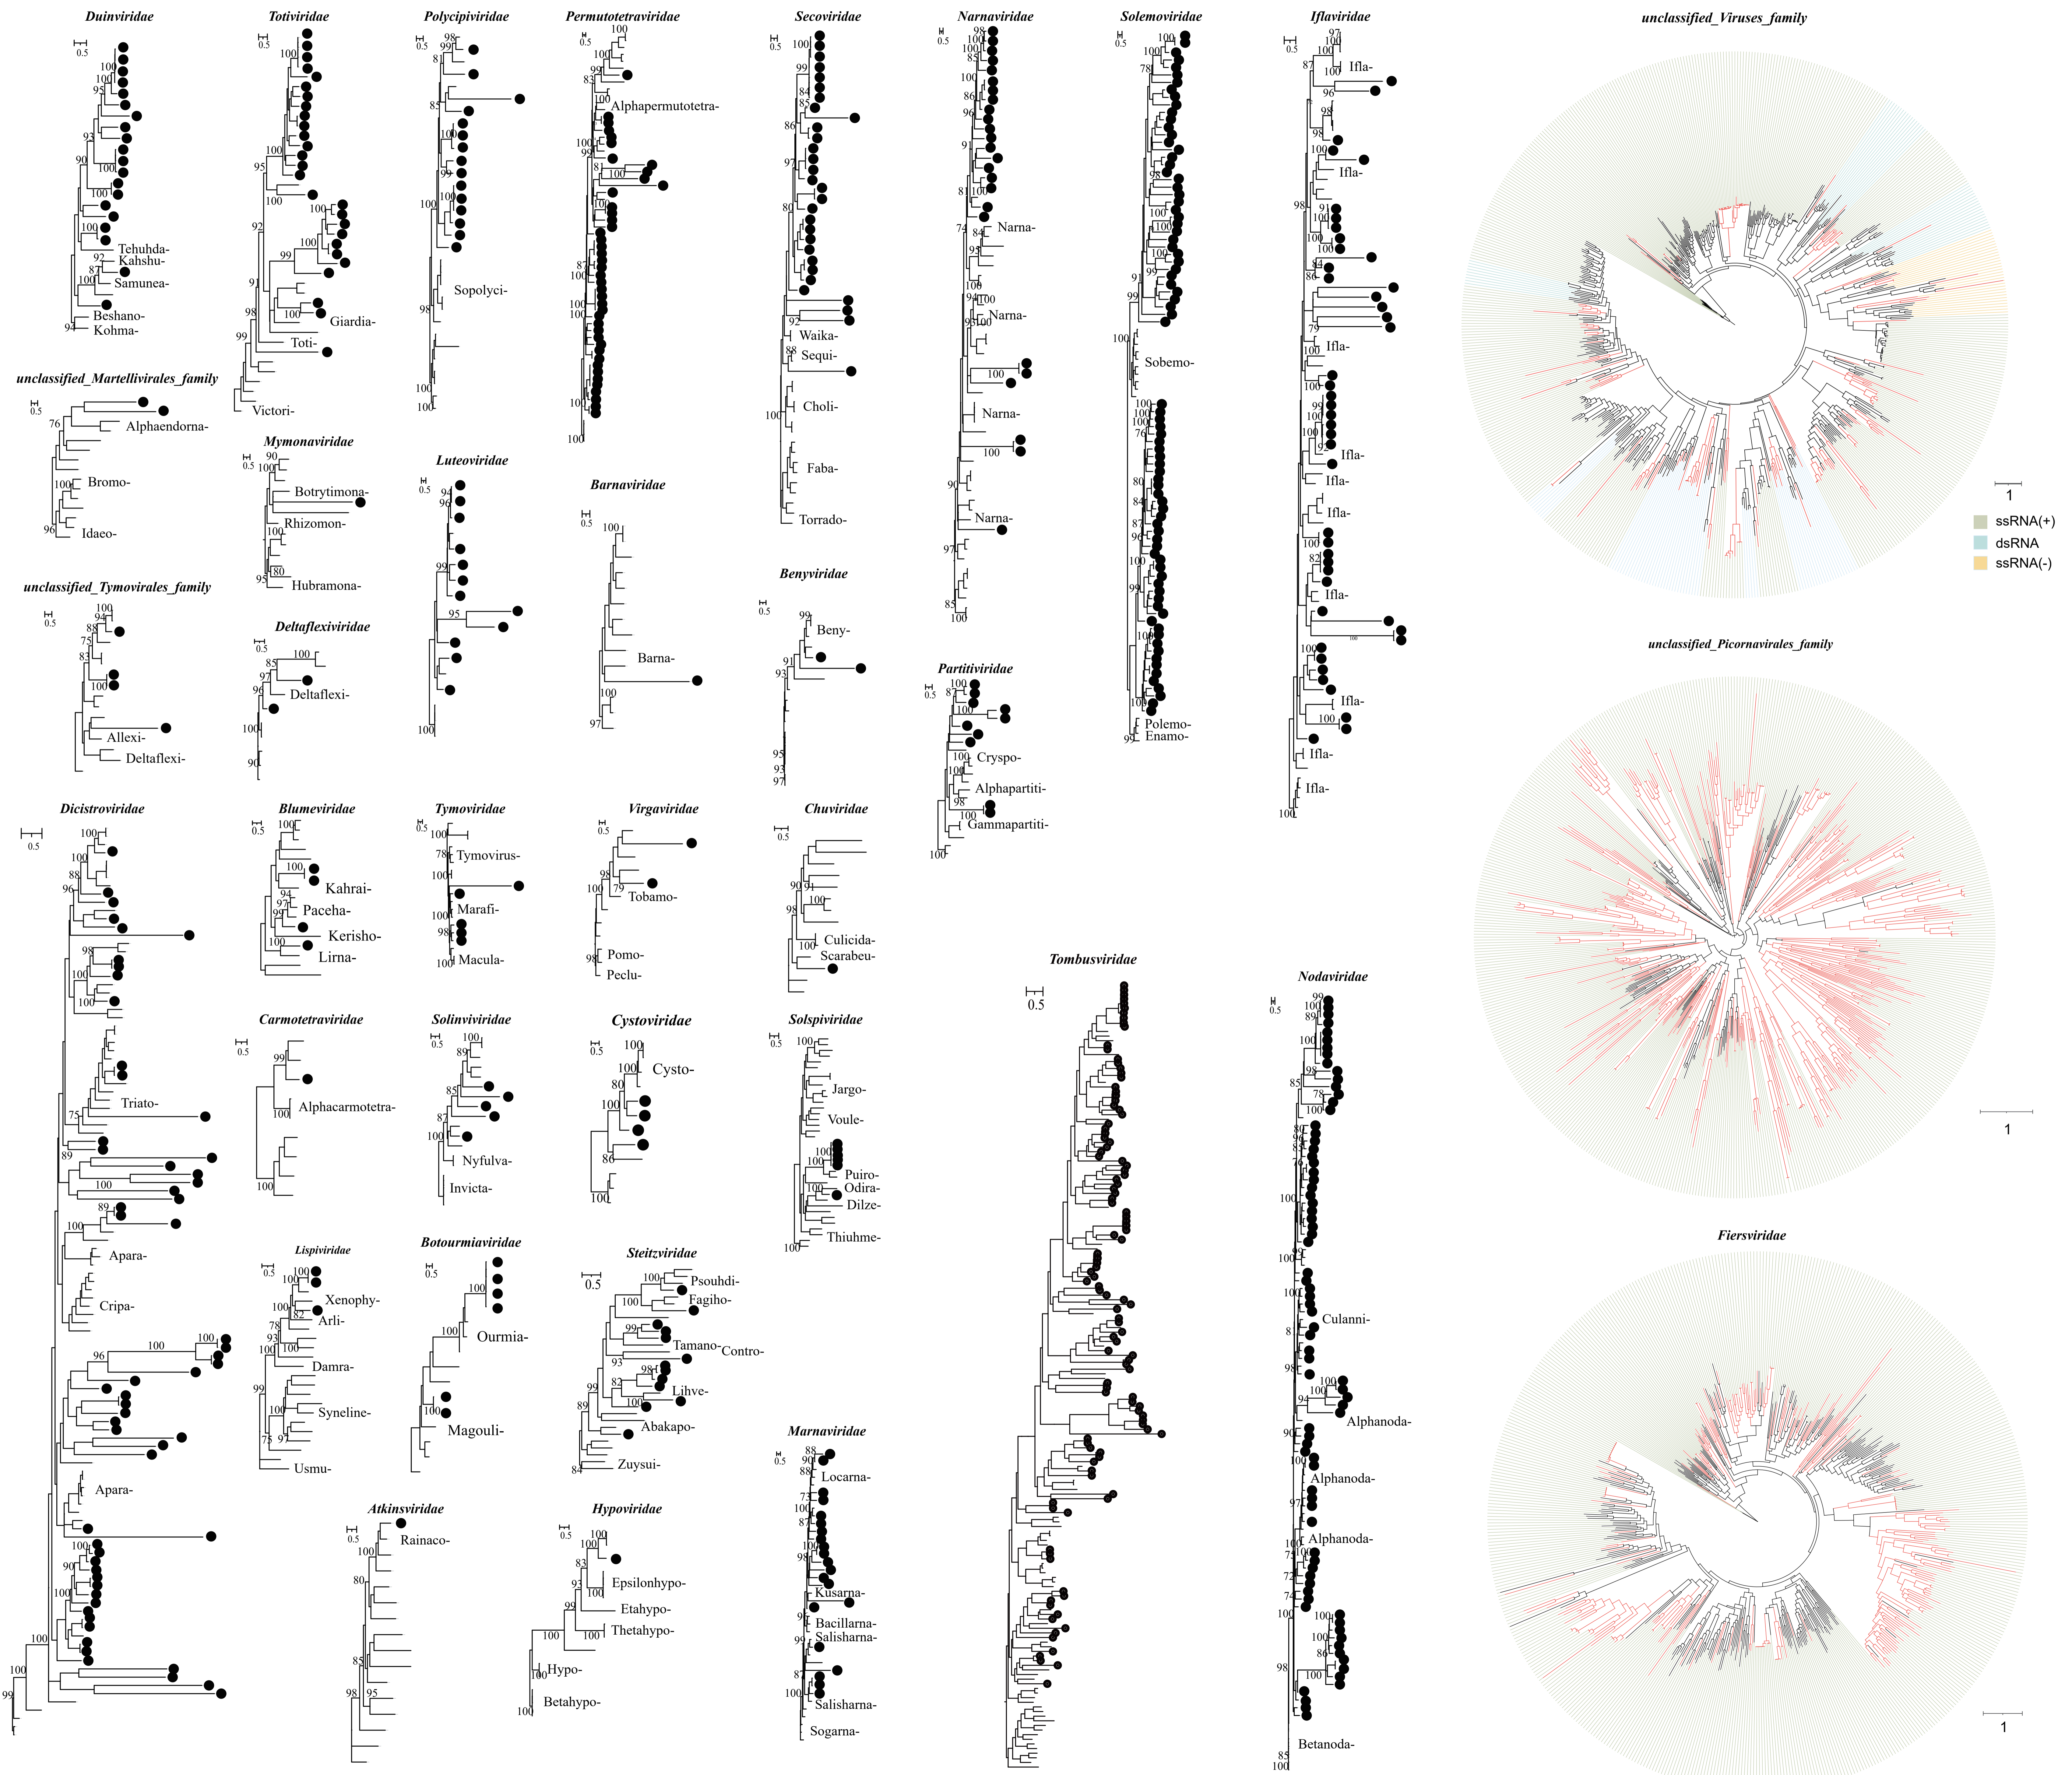

Supplement: spectrum.00802-24-s0001.pdf [file spectrum.00802-24-s0001.pdf]
